# Supplementary material
Source: PubMed Central journal article supplement (PMC5153958)
Supplement: JVIM-30-1099-s001.pdf [file JVIM-30-1099-s001.pdf]

|                                                                                          | <b>Affected<br/>dogs<br/>n=34<br/>Epicenter</b> | <b>Affected<br/>dogs<br/>n=34<br/>Remote</b> | <b>Control<br/>dogs<br/>n=11</b> |
|------------------------------------------------------------------------------------------|-------------------------------------------------|----------------------------------------------|----------------------------------|
| <b>1. Astrocytes</b>                                                                     |                                                 |                                              |                                  |
| <b>Number of stained cells</b>                                                           |                                                 |                                              |                                  |
| Grade 1 ( $\leq 20$ cells)                                                               | 20                                              | 11                                           | 8                                |
| Grade 2 (21-40 cells)                                                                    | 14                                              | 16                                           | 3                                |
| Grade 3 (41-60 cells)                                                                    |                                                 | 6                                            |                                  |
| Grade 4 ( $> 60$ cells)                                                                  |                                                 | 1                                            |                                  |
| <b>Intensity of staining</b>                                                             |                                                 |                                              |                                  |
| Grade 0 (no)                                                                             |                                                 |                                              |                                  |
| Grade 1 (mild)                                                                           | 4                                               | 2                                            | 2                                |
| Grade 2 (moderate)                                                                       | 9                                               | 7                                            | 9                                |
| Grade 3 (strong)                                                                         | 21                                              | 25                                           |                                  |
| <b>2. Neurons</b>                                                                        |                                                 |                                              |                                  |
| <b>Percentage of stained cells</b>                                                       |                                                 |                                              |                                  |
|                                                                                          | *                                               |                                              |                                  |
| Grade 1 ( $< 50\%$ of cells)                                                             | 10                                              | 5                                            |                                  |
| Grade 2 (50-75% of cells)                                                                | 7                                               | 10                                           |                                  |
| Grade 3 ( $> 75\%$ of cells)                                                             | 11                                              | 19                                           | 11                               |
| <b>Intensity of staining</b>                                                             |                                                 |                                              |                                  |
|                                                                                          | *                                               |                                              |                                  |
| Grade 0 (no)                                                                             | 3                                               |                                              |                                  |
| Grade 1 (mild)                                                                           | 20                                              | 12                                           | 5                                |
| Grade 2 (moderate)                                                                       | 4                                               | 20                                           | 6                                |
| Grade 3 (strong)                                                                         | 1                                               | 2                                            |                                  |
| <b>3. Immunoreactivity for endothelin-1<br/>(after merging of groups for statistics)</b> |                                                 |                                              |                                  |
| <b>Astrocytes</b>                                                                        |                                                 |                                              |                                  |
| Score 2                                                                                  | 4 (0)                                           | 1 (0)                                        | 2 (0)                            |
| Score 3                                                                                  | 5 (9)                                           | 6 (7)                                        | 6 (11)                           |
| Score 4                                                                                  | 15 (15)                                         | 7 (7)                                        | 3 (0)                            |
| Score 5                                                                                  | 10 (10)                                         | 13 (13)                                      |                                  |
| Score 6                                                                                  |                                                 | 6 (7)                                        |                                  |
| Score 7                                                                                  |                                                 | 1(0)                                         |                                  |
| <b>Neurons</b>                                                                           |                                                 |                                              |                                  |
|                                                                                          | *                                               |                                              |                                  |
| Score 1                                                                                  | 3 (0)                                           |                                              |                                  |
| Score 2                                                                                  | 7 (10)                                          | 3 (0)                                        |                                  |
| Score 3                                                                                  | 7 (7)                                           | 9 (12)                                       |                                  |
| Score 4                                                                                  | 6 (6)                                           | 5 (5)                                        | 5 (5)                            |
| Score 5                                                                                  | 4 (5)                                           | 15 (17)                                      | 6 (6)                            |
| Score 6                                                                                  | 1 (0)                                           | 2 (0)                                        |                                  |
